# Supplementary material
Source: Springer Nature journal article supplement (https://www.springermedizin.de/resource/supplementary/12967_2014_2113_MOESM19_ESM.pdf/9575066)

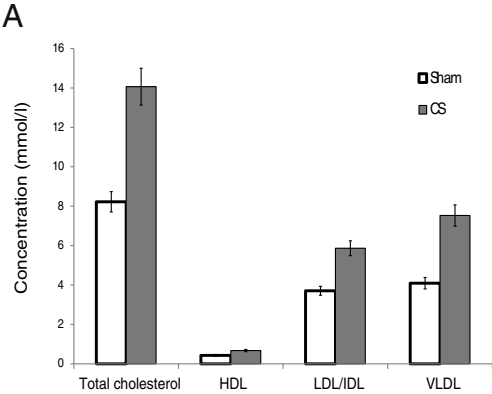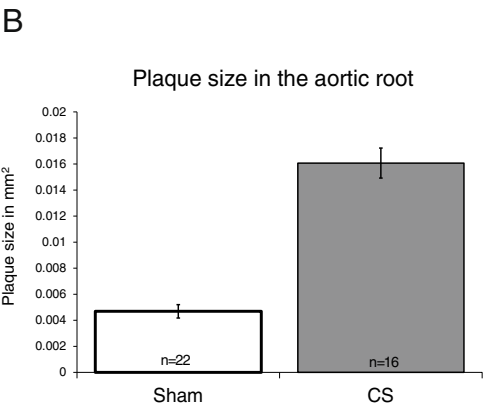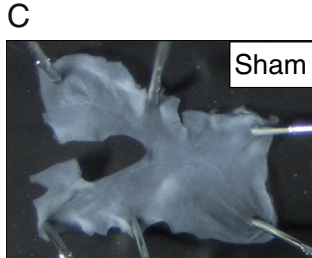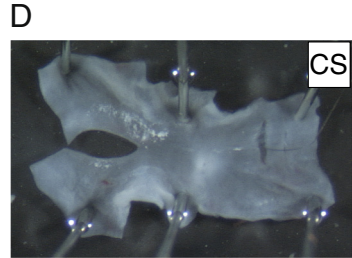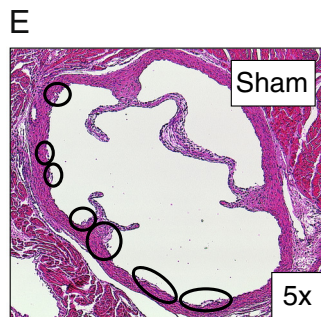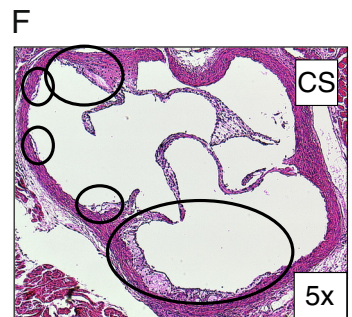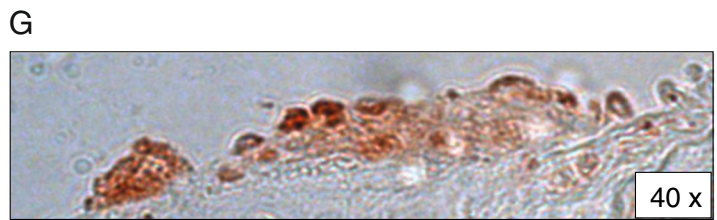

Supplement: MOESM19 [file 9575066]
